# Supplementary material for: The Genetic Diversity of Influenza A Viruses in Wild Birds in Peru
Source: PubMed Central journal article supplement (PMC4718589; doi:10.1371/journal.pone.0146059), 2016-01-19

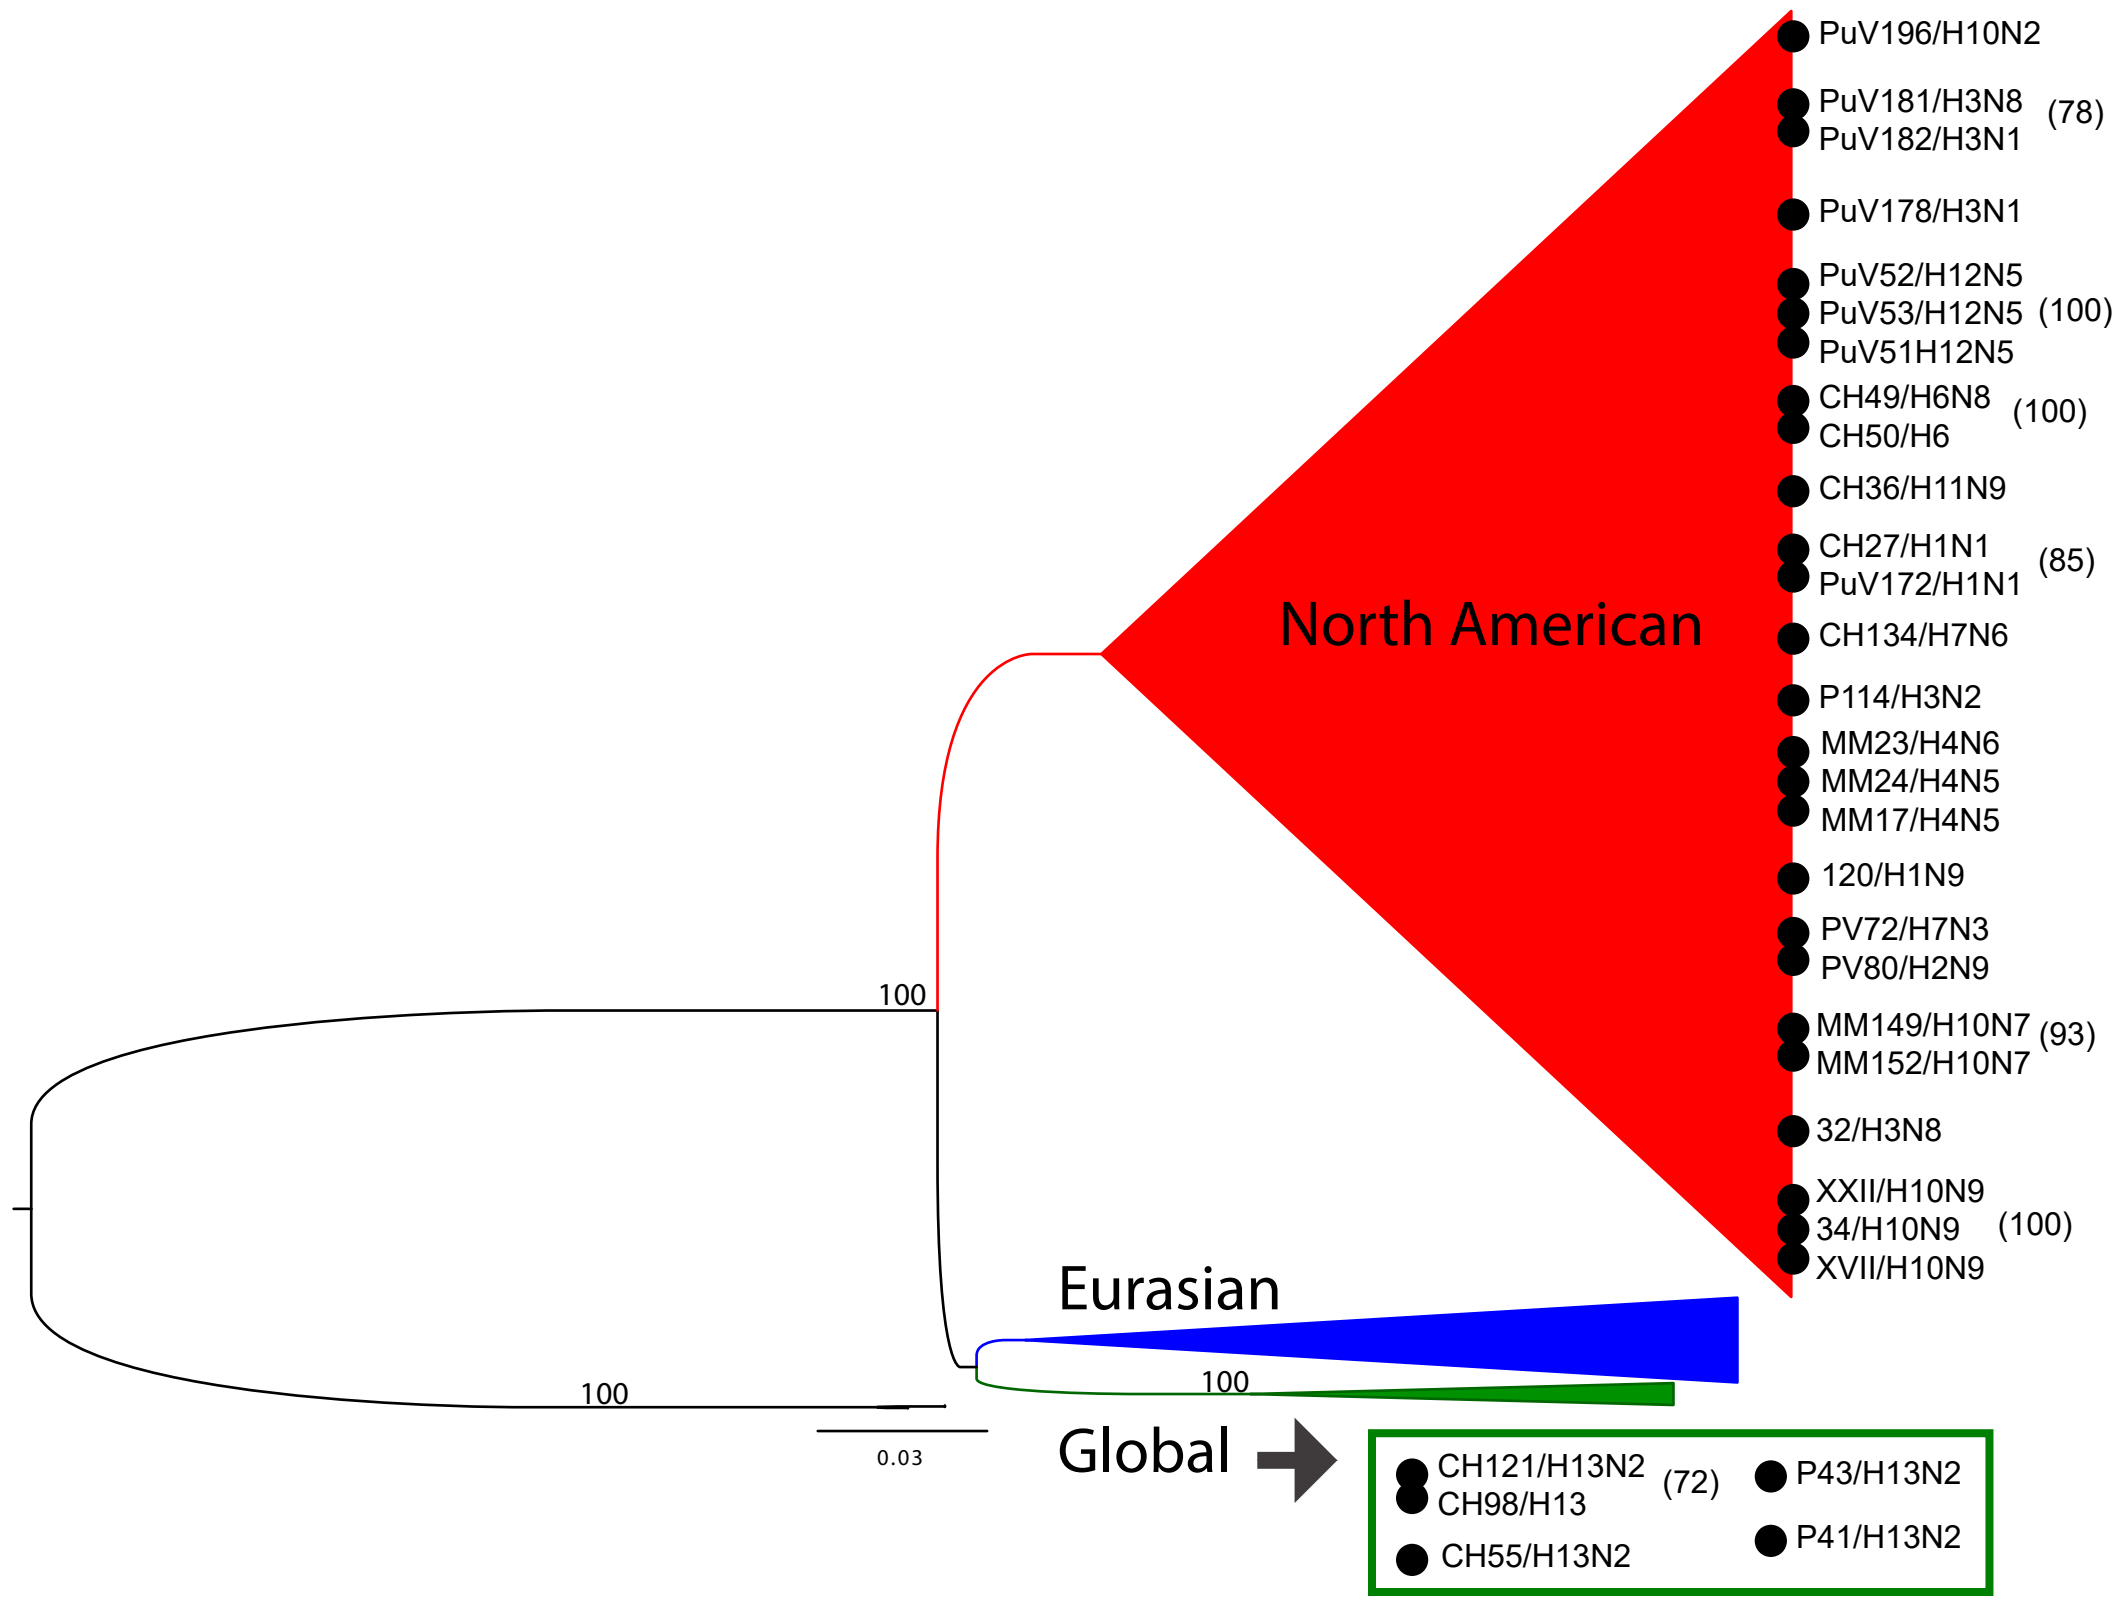

Supplement: pone.0146059.s005.pdf [file pone.0146059.s005.pdf]
